# Supplementary material for: No nitrogen fixation in the Bay of Bengal?
Source: Copernicus journal article supplement (doi:10.5194/bg-2019-347), 2019-09-10
Supplement: Supplementary file 1 [file bg-2019-347-supplement.pdf]

# 1 **Supplementary material to Löscher et al. 'No nitrogen fixation in the Bay of Bengal?'**

## 2 Model experiment

3 The model framework is the modified version of Canfield's 5-box model (Canfield 2006) as presented in Boyle  
4 et al. (2013), using the available measurements for the BoB (Tab. M1, the complete code will be released on  
5 Pangaea). It is based on identification of the limiting nutrient for euphotic primary production under Redfield  
6 conditions. Primary production provides the basis for determination of export fluxes under consideration of  
7 respiration first using oxygen, followed by nitrate and sulfate according to the following stoichiometry:

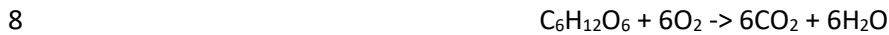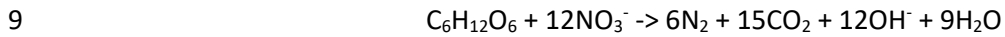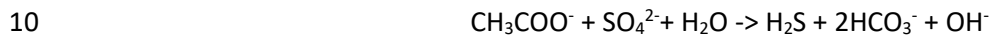

11 Export production is estimated as the sum of organic carbon respiration (R) of the three above mentioned  
12 processes:

$$13 \quad EP = R_{aerobic} + R_{denitrification} + R_{sulfate\_reduction}$$

14 For nitrate-based primary production, i.e. if nitrate is available above Redfield conditions, primary and  
15 export production directly depend on upwelling of bioavailable nitrogen. Surface N<sub>2</sub> fixation is based on  
16 Redfield stoichiometry and on Fe availability (Fe > 0). If

$$17 \quad N_{ox} - r_{N:P} P < 0$$

18 is true, export production is proportional to phosphate upwelling to the euphotic zone.

19 The model was further modified to explore OMZ N<sub>2</sub> fixation, which we suggest adding a source of reduced N  
20 (N<sub>R</sub>) to the OMZ. This pool of N<sub>R</sub> would upon mixing or upwelling to the oxic surface promote nitrification and  
21 primary production.

22 OMZ N<sub>2</sub> fixation has been shown not to be limited by Redfield constraints Redfield stoichiometry as suggested  
23 by Bombar, Paerl, and Riemann (2016). This leads to a modification of the previous OMZ model (Boyle et al,  
24 2013) with the Redfield control of N<sub>2</sub> fixation being replaced by a phosphorous only control with P > 0  
25 constantly allowing for N<sub>2</sub> fixation and export production scaling with phosphate and N<sub>ox</sub> + N<sub>R</sub> upwelling.

26

27    Tables

28    Tab M1: Concentrations used in the model experiment, data taken from Bristow et al. (2017), Grand et al.  
29    (2015) and (Chinni et al. 2019)

| Parameter               | Description                                         | Concentration [ $\mu\text{M}$ ] | Reference            |
|-------------------------|-----------------------------------------------------|---------------------------------|----------------------|
| $\text{O}_{2\text{U}}$  | Oxygen concentration in surface waters              | 220                             | Bristow et al., 2017 |
| $\text{O}_{2\text{I}}$  | Oxygen concentration in intermediate waters         | 0.05                            | Bristow et al., 2017 |
| $\text{O}_{2\text{D}}$  | Oxygen concentration in deep sea                    | 50                              | Bristow et al., 2017 |
| $\text{P}_{\text{U}}$   | Phosphate concentration in surface                  | 0                               | Bristow et al., 2017 |
| $\text{P}_{\text{I}}$   | Phosphate concentration in intermediate water depth | 2.7                             | Bristow et al., 2017 |
| $\text{P}_{\text{D}}$   | Phosphate concentration in deep waters              | 2.5                             | Bristow et al., 2017 |
| $\text{N}_{\text{oxU}}$ | Nitrate concentration in surfcae                    | 0                               | Bristow et al., 2017 |
| $\text{N}_{\text{oxI}}$ | Nitrate concentration in intermediate water depth   | 38                              | Bristow et al., 2017 |
| $\text{N}_{\text{oxD}}$ | Nitrate concentration in intermediate water depth   | 35                              | Bristow et al., 2017 |
| $\text{N}_{\text{RU}}$  | Ammonia concentration in surface                    | 0                               | Bristow et al., 2017 |
| $\text{N}_{\text{RI}}$  | Ammonia concentration in intermediate water depth   | 0                               | Bristow et al., 2017 |
| $\text{N}_{\text{RD}}$  | Ammonia concentration in deep sea                   | 0                               | Bristow et al., 2017 |
| $\text{Fe}_{\text{RU}}$ | Dissolved iron concentration in surface waters      | 0.0004                          | Chinni et al., 2019  |
| $\text{Fe}_{\text{RI}}$ | Dissolved iron concentration in intermediate waters | 0.015                           | Grand et al., 2015   |
| $\text{Fe}_{\text{RD}}$ | Dissolved iron concentration in deep sea            | 0.01                            | Grand et al., 2015   |

31    Table S1:  $\text{CO}_2$  and  $\text{N}_2$  fixation rates based on triplicate measurements at stations 1 (17.9970°N, 88.9968°E),  
32    4 (16.9828°N, 89.2063°E) and 5 (17.2075°N, 89.4282°E).  $\text{N}_2$  fixation was only measurable in two individual  
33    samples, but only in one out of three technical replicates.

| station # | Incubation depth | CO <sub>2</sub> fixation [nmol L <sup>-1</sup> d <sup>-1</sup> ] | SD    | N <sub>2</sub> fixation [nmol L <sup>-1</sup> d <sup>-1</sup> ] | SD  |
|-----------|------------------|------------------------------------------------------------------|-------|-----------------------------------------------------------------|-----|
| 1         | 67               | 460.1                                                            | 14.0  | 0.0                                                             | 0.0 |
| 1         | 106              | 186.2                                                            | 174.7 | 0.0                                                             | 0.0 |
| 1         | 112              | 0.0                                                              | 0.0   | 0.0                                                             | 0.0 |
| 1         | 128              | 8.8                                                              | 2.6   | 17.4                                                            | 8.2 |
| 1         | 169              | 4.8                                                              | 0.2   | 0.0                                                             | 0.0 |
| 1         | 253              | 2.0                                                              | 2.9   | 0.0                                                             | 0.0 |
| 4         | 60               | 286.1                                                            | 270.2 | 0.0                                                             | 0.0 |
| 4         | 112              | 50.6                                                             | 4.1   | 0.0                                                             | 0.0 |
| 4         | 145              | 0.0                                                              | 0.0   | 0.0                                                             | 0.0 |
| 4         | 176              | 2.4                                                              | 2.4   | 0.0                                                             | 0.0 |
| 4         | 213              | 3.2                                                              | 2.2   | 1.0                                                             | 0.5 |
| 4         | 265              | 10.2                                                             | 2.9   | 0.0                                                             | 0.0 |
| 5         | 60               | 1855.0                                                           | 157.6 | 0.0                                                             | 0.0 |
| 5         | 111              | 109.3                                                            | 5.8   | 0.0                                                             | 0.0 |
| 5         | 122              | 41.7                                                             | 1.2   | 0.0                                                             | 0.0 |
| 5         | 157              | 37.8                                                             | 3.8   | 0.0                                                             | 0.0 |
| 5         | 195              | 37.7                                                             | 4.5   | 0.0                                                             | 0.0 |
| 5         | 280              | 56.1                                                             | 12.4  | 0.0                                                             | 0.0 |

34

35 Table S2: OTU counts of primary producers from a metagenome from station #4, 84m.

| Class         | %of OTUs in metagenome | Order                      | % of OTUs in class |
|---------------|------------------------|----------------------------|--------------------|
| Cyanobacteria | 3,25%                  | Chroococcales              | 48%                |
|               |                        | Prochlorales               | 41%                |
|               |                        | Nostocales                 | 5%                 |
|               |                        | Oscillatoriales            | 5%                 |
|               |                        | unclassified cyanobacteria | 1%                 |
| Chlorophyta   | 0,33%                  | Mamiellales                | 75%                |
|               |                        | Chlamydomonadales          | 21%                |
|               |                        | Chlorellales               | 2%                 |
|               |                        | Ulvophyceae                | 0.4%               |
|               |                        | unclassified chlorophta    | 1.6%               |

36

37 Table S3: POC and PON distribution at stations 1 (17.9970°N, 88.9968°E), 4 (16.9828°N, 89.2063°E) and 5  
38 (17.2075°N, 89.4282°E).

| station # | Incubation depth | POC [ $\mu\text{mol L}^{-1}$ ] | SD    | PON [ $\mu\text{mol L}^{-1}$ ] | SD    | POC:PON |
|-----------|------------------|--------------------------------|-------|--------------------------------|-------|---------|
| 1         | 67               | 4.956                          | 0.195 | 0.531                          | 0.027 | 9.331   |
| 1         | 106              | 11.057                         | 5.038 | 1.411                          | 0.773 | 7.838   |
| 1         | 112              | 6.730                          | 2.493 | 0.700                          | 0.182 | 9.613   |
| 1         | 128              | 6.709                          | 1.015 | 0.818                          | 0.048 | 8.198   |
| 1         | 169              | 5.946                          | 0.830 | 0.586                          | 0.125 | 10.151  |
| 1         | 253              | 4.720                          | 1.774 | 0.262                          | 0.105 | 17.998  |
| 4         | 60               | 5.854                          | 0.734 | 0.688                          | 0.051 | 8.505   |
| 4         | 112              | 3.833                          | 0.336 | 0.395                          | 0.030 | 9.714   |
| 4         | 145              | 6.674                          | 2.634 | 1.022                          | 0.645 | 6.527   |
| 4         | 176              | 7.884                          | 1.713 | 1.247                          | 0.255 | 6.321   |
| 4         | 213              | 4.858                          | 0.112 | 0.676                          | 0.048 | 7.186   |
| 4         | 265              | 4.166                          | 0.667 | 0.475                          | 0.074 | 8.773   |
| 5         | 60               | 7.844                          | 1.094 | 1.253                          | 0.256 | 6.259   |
| 5         | 111              | 6.461                          | 1.462 | 1.013                          | 0.080 | 6.376   |
| 5         | 122              | 8.783                          | 1.263 | 1.488                          | 0.143 | 5.902   |
| 5         | 157              | 7.409                          | 0.241 | 1.325                          | 0.067 | 5.590   |
| 5         | 195              | 9.337                          | 0.404 | 1.433                          | 0.203 | 6.514   |
| 5         | 280              | 5.232                          | 0.659 | 0.674                          | 0.017 | 7.766   |

39  
40  
41 Table S4: *nifH* qPCR quantification [ $\text{copies L}^{-1}$ ], clusters which did were detectable by PCR but not  
42 quantifiable (below the detection limit of 4  $\text{copies L}^{-1}$ ) are not shown.

| station | depth [m] | filtration volume [L] | <i>nifH</i> [ $\text{copies L}^{-1}$ ] |         |          |         |              |         |
|---------|-----------|-----------------------|----------------------------------------|---------|----------|---------|--------------|---------|
|         |           |                       | filamentous                            | SD      | Gamma-PO | SD      | Green sulfur | SD      |
| 1       | 10        | 10.2                  | 8.2E+08                                | 4.6E+03 | 1.5E+03  | 5.6E+02 | 6.4E+03      | 2.6E+03 |
| 1       | 68        | 10.3                  | 1.4E+11                                | 2.2E+06 | 1.2E+03  | 1.6E+02 | 1.1E+04      | 1.2E+03 |
| 1       | 80        | 16.2                  | 2.4E+11                                | 6.1E+10 | 5.4E+02  | 0.0E+00 | 1.8E+03      | 2.0E+03 |
| 1       | 115       | 12.7                  | 0.0E+00                                | 0.0E+00 | 2.2E+03  | 3.8E+02 | 3.0E+03      | 1.5E+03 |
| 1       | 130       | 14                    | 0.0E+00                                | 0.0E+00 | 4.3E+03  | 9.0E+02 | 1.6E+03      | 5.0E+02 |
| 1       | 140       | 20                    | 0.0E+00                                | 0.0E+00 | 1.7E+11  | 3.9E+10 | 4.5E+02      | 2.3E+02 |
| 1       | 160       | 20.2                  | 0.0E+00                                | 0.0E+00 | 5.1E+02  | 6.9E+01 | 3.4E+03      | 1.1E+03 |
| 1       | 256       | 21.5                  | 0.0E+00                                | 0.0E+00 | 1.7E+03  | 1.7E+02 | 3.8E+03      | 5.5E+02 |
| 1       | 500       | 16.3                  | 0.0E+00                                | 0.0E+00 | 7.5E+02  | 3.3E+01 | 1.6E+03      | 1.4E+02 |
| 2       | 61        | 14                    | 6.7E+03                                | 8.5E+03 | 1.7E+03  | 2.6E+02 | 1.9E+03      | 7.4E+02 |
| 2       | 120       | 10.7                  | 8.3E+05                                | 3.7E+05 | 0.0E+00  | 0.0E+00 | 1.5E+03      | 1.2E+03 |
| 4       | 60        | 8                     | 0.0E+00                                | 0.0E+00 | 5.1E+02  | 7.3E+01 | 1.7E+03      | 3.4E+01 |
| 4       | 84        | 7.6                   | 0.0E+00                                | 0.0E+00 | 4.4E+02  | 6.1E+01 | 1.6E+03      | 1.4E+02 |
| 4       | 112       | 9.2                   | 0.0E+00                                | 0.0E+00 | 1.0E+12  | 1.3E+12 | 2.9E+03      | 3.4E+02 |
| 4       | 154       | 11.7                  | 0.0E+00                                | 0.0E+00 | 1.6E+02  | 2.0E+01 | 1.5E+04      | 2.1E+03 |
| 4       | 179       | 19.1                  | 0.0E+00                                | 0.0E+00 | 1.8E+02  | 4.1E+01 | 3.9E+03      | 1.0E+03 |
| 4       | 211       | 20.1                  | 0.0E+00                                | 0.0E+00 | 1.1E+02  | 1.8E+01 | 7.7E+02      | 2.8E+02 |
| 4       | 265       | 22.9                  | 5.4E+04                                | 7.0E+04 | 4.7E+02  | 0.0E+00 | 2.0E+03      | 1.3E+03 |
| 4       | 321       | 23.2                  | 3.0E+03                                | 3.2E+03 | 0.0E+00  | 0.0E+00 | 7.3E+02      | 1.7E+02 |
| 5       | 60        | 7.6                   | 5.8E+02                                | 5.1E+02 | 7.5E+02  | 2.3E+02 | 1.8E+03      | 5.8E+02 |
| 5       | 80        | 12.6                  | 8.9E+02                                | 4.4E+02 | 0.0E+00  | 0.0E+00 | 8.1E+02      | 1.8E+02 |
| 5       | 127       | 14.3                  | 0.0E+00                                | 0.0E+00 | 2.4E+03  | 7.9E+02 | 2.5E+04      | 8.8E+03 |
| 5       | 156       | 6.4                   | 0.0E+00                                | 0.0E+00 | 0.0E+00  | 0.0E+00 | 9.8E+02      | 1.5E+02 |
| 5       | 560       | 15.4                  | 8.2E+08                                | 4.6E+03 | 1.5E+03  | 5.6E+02 | 6.4E+03      | 2.6E+03 |

43  
44

45 **Figures**

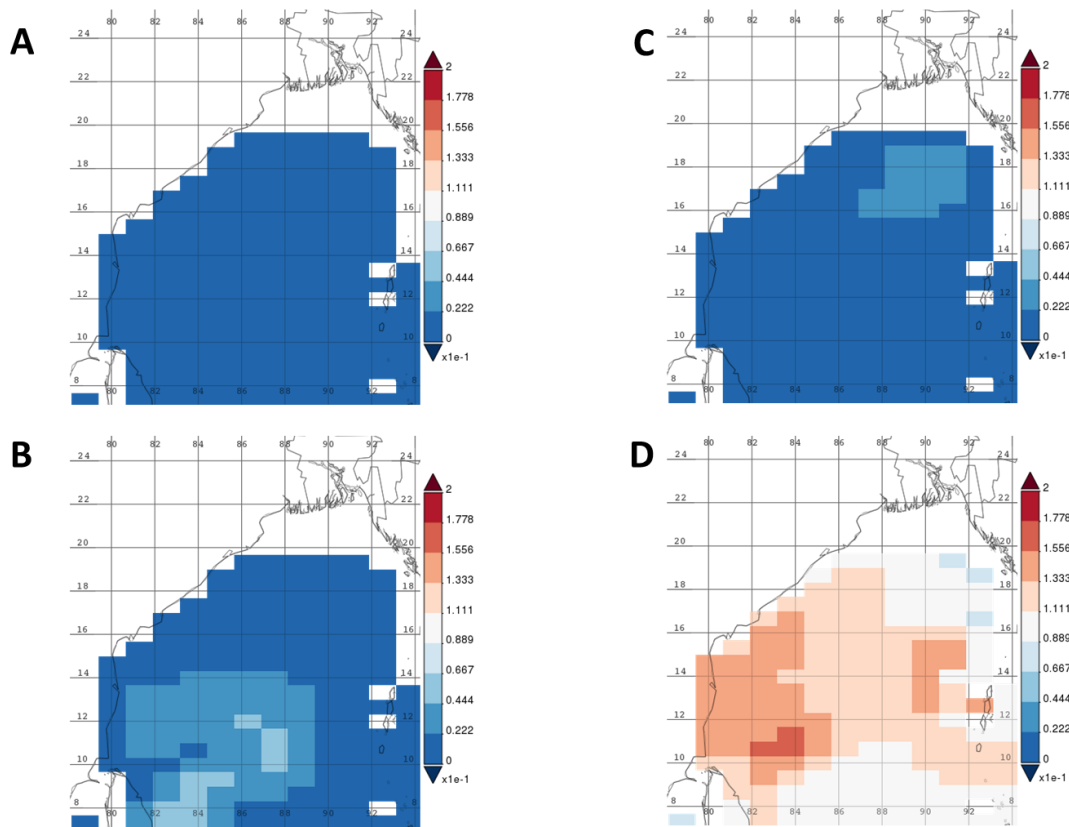

46  
47 Figure S1: (A) OTU quantification from a metagenome obtained from the depth with high carbon fixation (#4,  
48 84m) compared to satellite derived phytoplankton distribution in the BoB during the time of the cruise: (B)  
49 diatoms, (C) chlorophytes, (D) coccolithophores, and (A) cyanobacteria in  $\text{mg m}^{-3}$ .

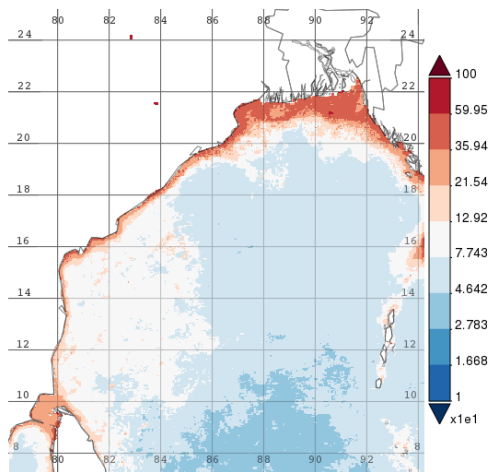

50  
51 Figure S2: Time averaged POC distribution as monitored via MODIS-Aqua on an 8-daily basis, with a 4km  
52 resolution, POC concentrations in  $\text{mg m}^{-3}$ , concentrations in the cruise area were between 7.7 and 12.9  $\text{mg}$   
53  $\text{m}^{-3}$  and are consistent with our in-situ measurements.

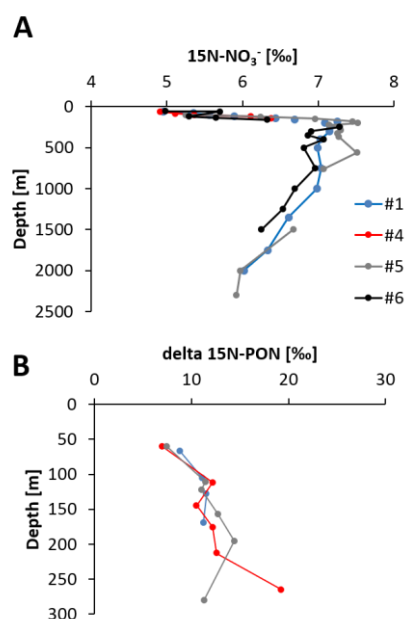

54

55 Fig. S3: Both, (A)  $^{15}\text{N-NO}_3^-$  (data from Bristow et al., 2017) and (B)  $\delta^{15}\text{N-PON}$  show slightly lighter isotope  
 56 signatures in the upper 100 m of the water column, however, this signal does not clearly indicate  $\text{N}_2$  fixation.

57

## 58 References

- 59 Bombar, Deniz, Ryan W. Paerl, and Lasse Riemann. 2016. 'Marine Non-Cyanobacterial Diazotrophs: Moving  
 60 beyond Molecular Detection', *Trends in Microbiology*, 24: 916-27.
- 61 Boyle, R. A., J. R. Clark, S. W. Poulton, G. Shields-Zhou, D. E. Canfield, and T. M. Lenton. 2013. 'Nitrogen  
 62 cycle feedbacks as a control on euxinia in the mid-Proterozoic ocean', *Nature Communications*, 4:  
 63 1533.
- 64 Bristow, L. A., C. M. Callbeck, M. Larsen, M. A. Altabet, J. Dekaezemacker, M. Forth, M. Gauns, R. N. Glud,  
 65 M. M. M. Kuypers, G. Lavik, J. Milucka, S. W. A. Naqvi, A. Pratihary, N. P. Revsbech, B. Thamdrup, A.  
 66 H. Treusch, and D. E. Canfield. 2017. ' $\text{N}_2$  production rates limited by nitrite availability in the Bay of  
 67 Bengal oxygen minimum zone', *Nature Geosci*, 10: 24-29.
- 68 Canfield, D. E. 2006. 'Models of oxic respiration, denitrification and sulfate reduction in zones of coastal  
 69 upwelling', *Geochimica et Cosmochimica Acta*, 70: 5753-65.
- 70 Chinni, Venkatesh, Sunil Kumar Singh, Ravi Bhushan, R. Rengarajan, and V. V. S. S. Sarma. 2019. 'Spatial  
 71 variability in dissolved iron concentrations in the marginal and open waters of the Indian Ocean',  
 72 *Marine Chemistry*, 208: 11-28.
- 73 Grand, Maxime M., Christopher I. Measures, Mariko Hatta, William T. Hiscock, William M. Landing, Peter L.  
 74 Morton, Clifton S. Buck, Pamela M. Barrett, and Joseph A. Resing. 2015. 'Dissolved Fe and Al in the  
 75 upper 1000 m of the eastern Indian Ocean: A high-resolution transect along 95°E from the Antarctic  
 76 margin to the Bay of Bengal', *Global Biogeochemical Cycles*, 29: 375-96.

77
